# Supplementary material
Source: PubMed Central journal article supplement (PMC4805467)
Supplement: NIHMS722862-supplement-01.pdf [file NIHMS722862-supplement-01.pdf]

**Supplemental Table 1. Immunohistochemistry protocols for cellular markers in pig and human tissues.**

| <b>Marker</b> | <b>Primary Antibody</b>                                                                                     | <b>Antigen Retrieval</b>                                            | <b>Secondary Reagents</b>                                                                                   |
|---------------|-------------------------------------------------------------------------------------------------------------|---------------------------------------------------------------------|-------------------------------------------------------------------------------------------------------------|
| CD3           | Rabbit anti-CD3 polyclonal (Dako North America, Inc., Carpinteria, CA);<br>Pig: 1:100/1hr; Human: 1:200/1hr | HIER, Citrate buffer pH 6.0, 110C for 15min; 20 min cool down       | Dako EnVision+ System- HRP Labelled Polymer Anti-rabbit, 30 min (Dako North America, Inc., Carpinteria, CA) |
| CD79a         | Mouse anti-CD79A (clone HM57) monoclonal, (LifeSpan BioSciences, Inc., Seattle, WA) 1:2000/1hr              | HIER, 10mM Tris/EDTA buffer pH 9.0, 125C for 5min; 20 min cool down | Dako EnVision+ System- HRP Labelled Polymer Anti-mouse, 15 min (Dako North America, Inc., Carpinteria, CA)  |
| BCL6          | Rabbit anti-Bcl-6 (clone EPR11410-43) monoclonal, (Abcam, Plc., Cambridge, MA) 1:2000/2hr                   | HIER, Citrate buffer pH 6.0, 110C for 15min; 20 min cool down       | Dako EnVision+ System- HRP Labelled Polymer Anti-rabbit, 30 min (Dako North America, Inc., Carpinteria, CA) |

|                        |                                                                                                                             |                                                                                      |                                                                                                                    |
|------------------------|-----------------------------------------------------------------------------------------------------------------------------|--------------------------------------------------------------------------------------|--------------------------------------------------------------------------------------------------------------------|
| <p>IBA1</p>            | <p>Rabbit anti-Iba1 polyclonal, (Wako Pure Chemical Industries, Ltd., Richmond, VA) 1:1000/1hr</p>                          | <p>HIER, Citrate buffer pH 6.0, 125C for 5min; 20 min cool down</p>                  | <p>Dako EnVision+ System- HRP Labelled Polymer Anti-rabbit, 30 min (Dako North America, Inc., Carpentaria, CA)</p> |
| <p>Myeloperoxidase</p> | <p>Rabbit anti-Myeloperoxidase polyclonal, (Dako North America, Inc., Carpentaria, CA) Pig: 1:500/1hr Human: 1:1000/1hr</p> | <p>Dako Proteinase K, 5 min (Dako North America, Inc., Carpentaria, CA)</p>          | <p>Dako EnVision+ System- HRP Labelled Polymer Anti-rabbit, 30 min (Dako North America, Inc., Carpentaria, CA)</p> |
| <p>MUC5AC</p>          | <p>Mouse anti-MUC5AC (clone 45M1) monoclonal, (Novus Biologicals, LLC, Littleton, CO) 1:75/30min</p>                        | <p>HIER, 1000W Microwave, Citrate Buffer pH 6.0, 4min x 3min, 20 min cool down</p>   | <p>Dako EnVision+ System- HRP Labelled Polymer Anti-mouse, 15 min (Dako North America, Inc., Carpentaria, CA)</p>  |
| <p>MUC5B</p>           | <p><u>Rabbit anti-MUC5B polyclonal, (LifeSpan BioSciences, Inc., Seattle,</u></p>                                           | <p><u>HIER, Citrate buffer pH 6.0, 110C for 15min; 20 min cool down</u>Pig: HIER</p> | <p><u>Step 1: Biotinylated anti-Rabbit IgG (H+L) (Vector Laboratories, Inc., Burlingame, CA) in Dako</u></p>       |

|             |                                                                                                                                                                                                                                                                                                   |                                                                                                                                                                                                                            |                                                                                                                                                                                                                                                                                                                                                                   |
|-------------|---------------------------------------------------------------------------------------------------------------------------------------------------------------------------------------------------------------------------------------------------------------------------------------------------|----------------------------------------------------------------------------------------------------------------------------------------------------------------------------------------------------------------------------|-------------------------------------------------------------------------------------------------------------------------------------------------------------------------------------------------------------------------------------------------------------------------------------------------------------------------------------------------------------------|
|             | <p><u>WA) in Dako Antibody Diluent</u><br/> <u>(Dako North America, Inc.,</u><br/> <u>Carpentaria, CA):</u><br/> <u>1:60,000/30min</u>Rabbit anti-<br/> MUC5B polyclonal, (Prestige<br/> Antibodies, Sigma Aldrich Co.<br/> LLC, St. Louis, MO) Pig:<br/> 1:50/2hr<br/> Human: 1:60,000/30min</p> | <p><del>Black &amp; Decker Steamer,</del><br/> Citrate buffer pH 6.0,<br/> preheat 40 min, incubate<br/> 20 min, 20 min cool down<br/> Human: HIER, Citrate<br/> buffer pH 6.0, 110C for<br/> 15 min; 20 min cool down</p> | <p><u>Wash Buffer (Dako North</u><br/> <u>America, Inc., Carpentaria, CA):</u><br/> <u>1:500, 30min</u><br/> <br/> <u>Step 2: Vectastain ABC Kit</u><br/> <u>(Vector Laboratories, Inc.,</u><br/> <u>Burlingame, CA), 30min</u>Dako<br/> EnVision+ System HRP<br/> Labelled Polymer Anti-rabbit, 30<br/> min (Dako North America, Inc.,<br/> Carpentaria, CA)</p> |
| Lactoferrin | <p>Rabbit anti-Lactoferrin<br/> polyclonal (Immunology<br/> Consultants Laboratory, Inc.,<br/> Portland, OR)<br/> Pig: 1:750/1hr</p>                                                                                                                                                              | <p>HIER, Citrate buffer pH<br/> 6.0, 110C for 15 min; 20<br/> min cool down</p>                                                                                                                                            | <p>Dako EnVision+ System- HRP<br/> Labelled Polymer Anti-rabbit, 30<br/> min (Dako North America, Inc.,<br/> Carpentaria, CA)</p>                                                                                                                                                                                                                                 |

|                                   |                                                                                                                                                                              |                                                                |                                                                                                                                                                                                        |
|-----------------------------------|------------------------------------------------------------------------------------------------------------------------------------------------------------------------------|----------------------------------------------------------------|--------------------------------------------------------------------------------------------------------------------------------------------------------------------------------------------------------|
|                                   | Human: 1:1000/1hr                                                                                                                                                            |                                                                |                                                                                                                                                                                                        |
| <i>beta</i> -Tubulin III          | Rabbit anti-beta III Tubulin polyclonal, (Abcam, Plc., Cambridge, MA) 1:500/1.5hr/37C oven                                                                                   | HIER, Citrate buffer pH 6.0, 110C for 15 min; 20 min cool down | Dako EnVision+ System- HRP Labelled Polymer Anti-rabbit, 30 min (Dako North America, Inc., Carpinteria, CA)                                                                                            |
| CFTR                              | Mouse anti-CFTR monoclonal, (Primary Ab #769 was generously supplied by Dr. John Riordan, Ph.D., UNC –Chapel Hill and the CFF Therapeutics. UNC, Chapel Hill, NC) 1:1200/1hr | HIER, Citrate buffer pH 6.0, 110C for 15 min; 20 min cool down | Pig: Biocare Mouse-on-Farma HRP Polymer, 30min (Biocare Medical, Concord, CA)<br><br>Human: Dako EnVision+ System- HRP Labelled Polymer Anti-mouse, 30 min (Dako North America, Inc., Carpinteria, CA) |
| <i>alpha</i> -Smooth Muscle Actin | Mouse anti-Actin, alpha-Smooth Muscle (clone 1A4) monoclonal (Sigma-Aldrich                                                                                                  | None                                                           | Dako EnVision+ System- HRP Labelled Polymer Anti-mouse, 12 min (Dako North America, Inc.,                                                                                                              |

|  |                                         |  |                  |
|--|-----------------------------------------|--|------------------|
|  | Co. LLC, St. Louis, MO)<br>1:2000/15min |  | Carpentaria, CA) |
|  |                                         |  |                  |

HIER – Heat Induced Epitope Retrieval (unless otherwise specified - Decloaking Chamber Plus, Biocare Medical, Concord, CA USA)
